# Supplementary material for: Medulloblastoma group 3 and 4 tumors comprise a clinically and biologically significant expression continuum reflecting human cerebellar development
Source: PubMed Central journal article supplement (PMC9638015; doi:10.1016/j.celrep.2022.111162), 2022-08-03
Supplement: mmc2.pdf [file mmc2.pdf]

| Demographic Summary of Patients          |               |               |                 |                |                |              |                 |
|------------------------------------------|---------------|---------------|-----------------|----------------|----------------|--------------|-----------------|
|                                          | Subgroup      |               |                 |                |                |              | Total           |
|                                          | Group3        | Group3/Group4 | Group4          | SHH            | WNT            | MB-NOS       |                 |
| <b>Sex</b>                               |               |               |                 |                |                |              |                 |
| Male                                     | 41/55 (74.5%) | 8/12 (66.7%)  | 96/132 (72.7%)  | 31/61 (50.8%)  | 13/28 (46.4%)  | 5/7 (71.4%)  | 194/295 (65.8%) |
| <b>Age</b>                               |               |               |                 |                |                |              |                 |
| Adult (>16 years)                        | 0/56 (0.0%)   | 0/12 (0.0%)   | 2/134 (1.5%)    | 5/61 (8.2%)    | 1/29 (3.4%)    | 1/7 (14.3%)  | 9/299 (3.0%)    |
| Infant (<3 years)                        | 18/56 (32.1%) | 0/12 (0.0%)   | 6/134 (4.5%)    | 18/61 (29.5%)  | 0/29 (0.0%)    | 2/7 (28.6%)  | 44/299 (14.7%)  |
| <b>Clinicopathology</b>                  |               |               |                 |                |                |              |                 |
| Relapse                                  | 25/50 (50.0%) | 3/10 (30.0%)  | 43/124 (34.7%)  | 23/55 (41.8%)  | 3/28 (10.7%)   | 4/7 (57.1%)  | 101/274 (36.9%) |
| DOD                                      | 26/54 (48.1%) | 3/12 (25.0%)  | 39/131 (29.8%)  | 22/60 (36.7%)  | 4/29 (13.8%)   | 4/7 (57.1%)  | 98/293 (33.4%)  |
| Sub Total Resection                      | 8/50 (16.0%)  | 2/12 (16.7%)  | 31/114 (27.2%)  | 4/55 (7.3%)    | 1/28 (3.6%)    | 0/6 (0.0%)   | 46/265 (17.4%)  |
| LCA                                      | 7/42 (16.7%)  | 2/11 (18.2%)  | 8/105 (7.6%)    | 9/50 (18.0%)   | 4/24 (16.7%)   | 0/6 (0.0%)   | 30/238 (12.6%)  |
| DN                                       | 1/42 (2.4%)   | 0/11 (0.0%)   | 6/105 (5.7%)    | 16/50 (32.0%)  | 0/24 (0.0%)    | 0/6 (0.0%)   | 23/238 (9.7%)   |
| M+                                       | 21/50 (42.0%) | 4/12 (33.3%)  | 33/122 (27.0%)  | 12/58 (20.7%)  | 2/29 (6.9%)    | 1/6 (16.7%)  | 73/277 (26.4%)  |
| <b>Mutations</b>                         |               |               |                 |                |                |              |                 |
| GF11B rearrangement                      | 0/63 (0.0%)   | 0/13 (0.0%)   | 3/147 (2.0%)    | 0/67 (0.0%)    | 0/31 (0.0%)    | 0/10 (0.0%)  | 3/331 (0.9%)    |
| GF11 rearrangement                       | 5/63 (7.9%)   | 0/13 (0.0%)   | 4/147 (2.7%)    | 0/67 (0.0%)    | 0/31 (0.0%)    | 0/10 (0.0%)  | 9/331 (2.7%)    |
| MYCN amplification                       | 0/47 (0.0%)   | 1/11 (9.1%)   | 7/118 (5.9%)    | 13/55 (23.6%)  | 0/27 (0.0%)    | 1/5 (20.0%)  | 22/263 (8.4%)   |
| MYC amplification                        | 10/47 (21.3%) | 1/11 (9.1%)   | 2/118 (1.7%)    | 0/54 (0.0%)    | 0/27 (0.0%)    | 0/5 (0.0%)   | 13/262 (5.0%)   |
| TERT                                     | 0/42 (0.0%)   | 0/10 (0.0%)   | 1/108 (0.9%)    | 16/51 (31.4%)  | 0/25 (0.0%)    | 1/6 (16.7%)  | 18/242 (7.4%)   |
| TP53                                     | 1/63 (1.6%)   | 0/12 (0.0%)   | 1/143 (0.7%)    | 12/67 (17.9%)  | 1/31 (3.2%)    | 0/8 (0.0%)   | 15/324 (4.6%)   |
| CTNNB1                                   | 0/50 (0.0%)   | 0/11 (0.0%)   | 1/109 (0.9%)    | 0/53 (0.0%)    | 25/28 (89.3%)  | 0/6 (0.0%)   | 26/257 (10.1%)  |
| <b>MB(Grp3/Grp4) methylation subtype</b> |               |               |                 |                |                |              |                 |
| I                                        | 2/63 (3.2%)   | 1/13 (7.7%)   | 2/147 (1.4%)    | 0/67 (0.0%)    | 0/31 (0.0%)    | 0/10 (0.0%)  | 5/331 (1.5%)    |
| II                                       | 22/63 (34.9%) | 0/13 (0.0%)   | 0/147 (0.0%)    | 0/67 (0.0%)    | 0/31 (0.0%)    | 0/10 (0.0%)  | 22/331 (6.6%)   |
| III                                      | 10/63 (15.9%) | 4/13 (30.8%)  | 0/147 (0.0%)    | 0/67 (0.0%)    | 0/31 (0.0%)    | 1/10 (10.0%) | 15/331 (4.5%)   |
| IV                                       | 16/63 (25.4%) | 1/13 (7.7%)   | 0/147 (0.0%)    | 0/67 (0.0%)    | 0/31 (0.0%)    | 0/10 (0.0%)  | 17/331 (5.1%)   |
| V                                        | 3/63 (4.8%)   | 2/13 (15.4%)  | 11/147 (7.5%)   | 0/67 (0.0%)    | 0/31 (0.0%)    | 1/10 (10.0%) | 17/331 (5.1%)   |
| VI                                       | 0/63 (0.0%)   | 1/13 (7.7%)   | 18/147 (12.2%)  | 0/67 (0.0%)    | 0/31 (0.0%)    | 0/10 (0.0%)  | 19/331 (5.7%)   |
| VII                                      | 1/63 (1.6%)   | 1/13 (7.7%)   | 35/147 (23.8%)  | 0/67 (0.0%)    | 0/31 (0.0%)    | 0/10 (0.0%)  | 37/331 (11.2%)  |
| VIII                                     | 0/63 (0.0%)   | 0/13 (0.0%)   | 48/147 (32.7%)  | 0/67 (0.0%)    | 0/31 (0.0%)    | 0/10 (0.0%)  | 48/331 (14.5%)  |
| Unknown/NA                               | 9/63 (14.3%)  | 3/13 (23.1%)  | 33/147 (22.4%)  | 67/67 (100.0%) | 31/31 (100.0%) | 8/10 (80.0%) | 151/331 (45.6%) |
| <b>Methylation subgroup</b>              |               |               |                 |                |                |              |                 |
| Group3                                   | 52/63 (82.5%) | 6/13 (46.2%)  | 3/147 (2.0%)    | 0/67 (0.0%)    | 0/31 (0.0%)    | 1/10 (10.0%) | 62/331 (18.7%)  |
| Group4                                   | 6/63 (9.5%)   | 5/13 (38.5%)  | 125/147 (85.0%) | 0/67 (0.0%)    | 0/31 (0.0%)    | 1/10 (10.0%) | 137/331 (41.4%) |
| SHH                                      | 0/63 (0.0%)   | 0/13 (0.0%)   | 0/147 (0.0%)    | 0/67 (0.0%)    | 29/31 (93.5%)  | 0/10 (0.0%)  | 29/331 (8.8%)   |
| WNT                                      | 0/63 (0.0%)   | 0/13 (0.0%)   | 0/147 (0.0%)    | 61/67 (91.0%)  | 0/31 (0.0%)    | 6/10 (60.0%) | 67/331 (20.2%)  |
| Unknown/NA                               | 5/63 (7.9%)   | 2/13 (15.4%)  | 19/147 (12.9%)  | 6/67 (9.0%)    | 2/31 (6.5%)    | 2/10 (20.0%) | 36/331 (10.9%)  |
